# Supplementary material
Source: PubMed Central journal article supplement (PMC9517713)

## Supplementary Figure Legend

Fig. S1. A. Some BILF2 CRISPRi sgRNA affected BALF4 and BALF5 expression, but not BILF1 expression.

B. RNA-seq analyses of EBV gene expression in T/NK lymphoma cell lines.

Sup 1

A

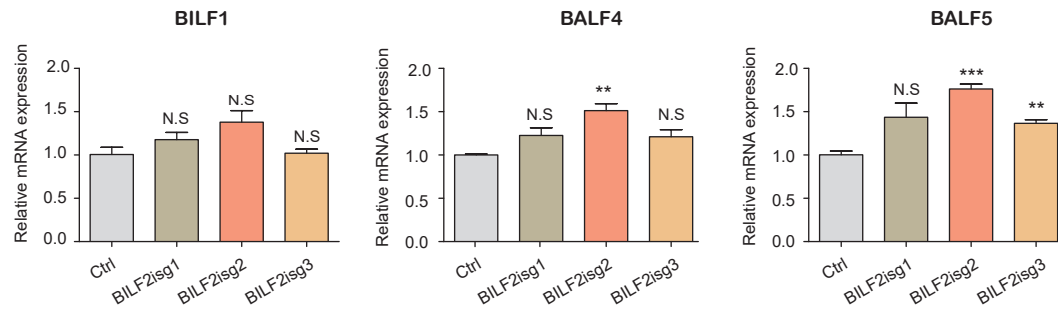

B

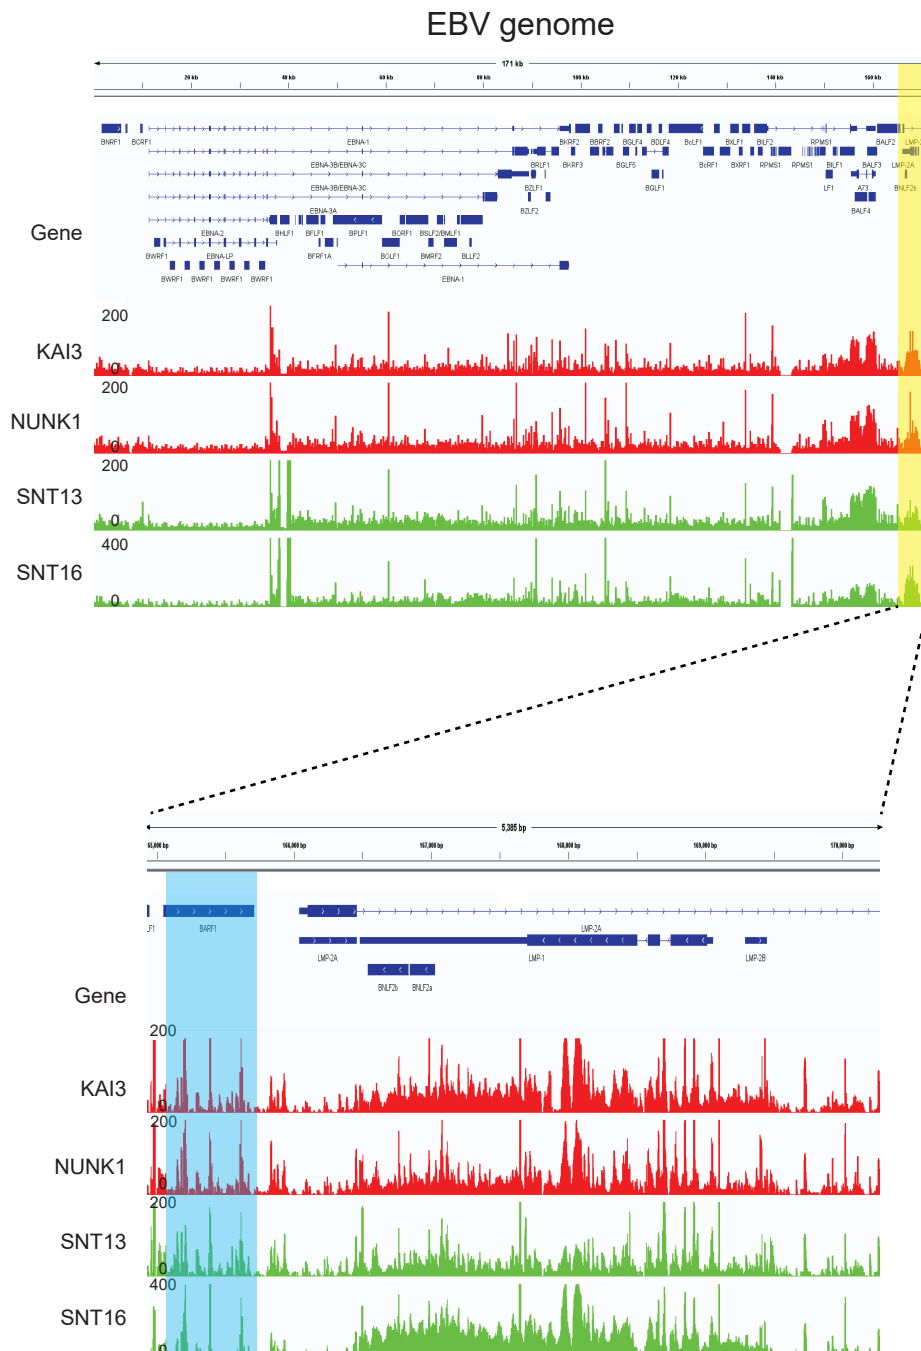

Supplement: jvi.00739-22-s0001.pdf [file jvi.00739-22-s0001.pdf]
